# Supplementary material for: Imaging of ONOO− fluctuations during drug-induced liver/kidney injury in vitro and in vivo via a dicyanoisophorone-based NIR fluorescent probe with a large Stokes shift
Source: Royal Society of Chemistry journal article supplement (doi:10.1039/d4tb01446d), 2024-01-01
Supplement: d4tb01446d1.pdf [file d4tb01446d1.pdf]

# **Imaging of ONOO<sup>-</sup> fluctuations during drug-induced liver/kidney injury *in vitro* and *in vivo* a dicyanoisophorone-based NIR fluorescent probe with large Stokes shift**

Fei Kong<sup>b#</sup>, Hengqing Liu<sup>c</sup>, Jie Huang<sup>d</sup>, Jingcan Qin<sup>a\*</sup>

<sup>a</sup> Department of Radiology, Changhai Hospital, Naval Medical University, Changhai Road 168, Shanghai 200433, China

<sup>b</sup> School of Chemistry and Chemical Engineering, Shanghai Jiao Tong University, Dongchuan Road 800, Shanghai 200240, China

<sup>c</sup> School of Life Science, Fudan University, Songhu Road 2005, Shanghai 200438 China

<sup>d</sup> School of Biomedical Engineering, Guangzhou Medical University, Guangzhou 511436, China

# Current address: Dongchuan Road 880, Shanghai 200240, China

\*Corresponding author: e-mail: qinjingcan1988@163.com (JC.Q)

## 1.1. Reagents and instruments

All reagents used for synthesis were obtained from Aladdin without further purification. Column chromatography was performed on silica gel (200–300 mesh).  $^1\text{H}$  and  $^{13}\text{C}$  NMR spectra were recorded in DMSO- $d_6$  at room temperature on Bruker DRX-500 (500 MHz). Mass spectra were obtained at the Mass Spectrometry Facility at Shanghai Jiao Tong University. Fluorescence studies were carried out with F-7000 Fluorescence Spectrophotometer. UV spectrum was treated in UV-2550 ultraviolet spectrophotometer. Fluorescence imaging was conducted on microscope (Nikon Eclipse). *In vivo* imaging was carried out on PE IVIS Lumina XR III. The stock solution of the probe NNP was diluted at 1 mM in DMSO for further testing.

All spectroscopic measurements of the probe (20  $\mu\text{M}$ ) were performed in pH 7.4, 10 mM phosphate buffer with 10% DMSO. All the spectroscopic reactions were tested at 37 °C. Unless otherwise noted, for all the measurements, the excitation wavelength was 490 nm, the both excitation and emission slit widths were 5 nm. The emission spectrum was measured and scanned from 550 nm to 800 nm.

## 1.2. Preparation of various analytes

Reactive oxygen species were prepared as follows:

$\text{H}_2\text{O}_2$  and  $\text{ClO}^-$ : Dilution of commercially purchased solutions to the experimental concentration (100  $\mu\text{M}$ ) by PBS (pH 7.4). NO: Sodium (III) nitroferricyanide dihydrate was dissolved in deoxygenated ultrapure water and stored at 4 °C to prepare NO.  $^1\text{O}_2$  was produced by addition of  $\text{ClO}^-$  solution (100 mM, 1 mL) into  $\text{H}_2\text{O}_2$  solution (200 mM, 1 mL).  $\text{O}_2^{\cdot-}$  was generated from  $\text{KO}_2$  (35.5 mg), which was directly added into DMSO (10 mL) at a final concentration of 50 mM.  $\cdot\text{OH}$  was produced by addition of

ferrous chloride (0.1 M, 1 mL) into H<sub>2</sub>O<sub>2</sub> solution (1.0 M, 1 mL) through a Fenton reaction. NO<sub>2</sub><sup>-</sup>: Dissolving NaNO<sub>2</sub> in ultrapure water to prepare NO<sub>2</sub><sup>-</sup>. ONOO<sup>-</sup>: ONOO<sup>-</sup> was synthesized by the reaction of NaNO<sub>2</sub> and H<sub>2</sub>O<sub>2</sub> under concentrated hydrochloric acid condition and stored in sodium hydroxide solution, and concentration of ONOO<sup>-</sup> was determined by UV-Vis spectrophotometer ( $\epsilon$  was 1670 M<sup>-1</sup> cm<sup>-1</sup> at 302 nm).

Other testing analytes were prepared from the Cysteine, Glutathione, Homocysteine, NaCl, KCl, Na<sub>2</sub>CO<sub>3</sub>, NaHCO<sub>3</sub>, NaNO<sub>2</sub>, Na<sub>2</sub>SO<sub>4</sub>, Na<sub>2</sub>S, MgCl<sub>2</sub>, MgSO<sub>4</sub>, CuCl<sub>2</sub> in the doubly distilled water.

### 1.3 Determination of fluorescence quantum yield

Fluorescence quantum yield ( $\Phi$ ) of PNDP and Compound 1 was measured by using rhodamine B ( $\Phi_f = 0.97$  in ethanol) as a fluorescence standard, and referred to the following equation:

$$\Phi_u = [(A_s F_u n^2) / (A_u F_s n_0^2)] \Phi_s.$$

Where A<sub>s</sub>(the standard) and A<sub>u</sub>( the sample) are the absorbance at the excitation wavelength (A is kept between 0.01 and 0.05), F<sub>s</sub> (the standard) and F<sub>u</sub>(the sample) are the integrated emission band areas under the same conditions, n is the refractive index of the solvent( the sample), n<sub>0</sub> is the refractive index of the solvent (the standard.  $\Phi_s$  is fluorescence quantum yield of the standard.

### 1.4. Cytotoxicity

HepG2 cells and HK-2 cells were cultured in Dulbecco's Modified Eagle Medium media (DMEM, Gibco) containing 10% fetal bovine serum (FBS, Gibco) and 100 U/mL penicillin and 100  $\mu$ g/mL streptomycin (Gibco) at 37 °C and 5% CO<sub>2</sub>. The HepG2 cells HK-2 cells were seeded in the 96-well plates at the density of 5 × 10<sup>3</sup>

cells/well and cultured overnight. Various concentrations of PNDP were added to the wells at final concentrations of 1, 5, 10, 20, 30, 50  $\mu\text{M}$ . After co-incubation for 24 h, the cell viabilities were measured using CCK-8 assays. Cells treated with PBS were used as controls.

### 1.5. Cell imaging

HepG2 cells and HK-2 cells were cultured in Dulbecco's Modified Eagle Medium media (DMEM, Gibco) containing 10% fetal bovine serum (FBS, Gibco) and 100 U/mL penicillin and 100  $\mu\text{g}/\text{mL}$  streptomycin (Gibco) at 37 °C and 5%  $\text{CO}_2$ . For cell imaging assays, HepG-2 cells were pretreated with PBS, 3-morpholino pyridinimine hydrochloride (SIN-1) (100  $\mu\text{M}$ , 1 h), and lipopolysaccharide (LPS) (1  $\mu\text{g}/\text{mL}$ , 10 h) at 37 °C, respectively. HK-2 cells were pretreated with PBS, SIN-1 (100  $\mu\text{M}$ , 1 h), and cisplatin (30  $\mu\text{M}$ , 24 h) at 37 °C. After washing thrice with PBS, the cells were incubated with PNDP at 20  $\mu\text{M}$  for 30 min. Cells without any treatment were used as controls. The cells were then imaged respectively by a fluorescence microscope.

### 1.5. In vivo imaging of DILI and DIKI in mice

All animal experiments were approved by the Changhai Hospital and complied with the Guide for the Care and Use of Laboratory Animals. Acetaminophen (APAP) induced ALI model was performed by giving the mice APAP at the dosage of 400 mg/kg *via* intraperitoneal (i.p.) injection. Cisplatin induced AKI model was performed by treating mice i.p. with cisplatin (20 mg/kg). The ALI or AKI model mice and normal mice were randomly divided into two groups. One group of mice were intravenously injected (*i.v.*) with PNDP (100  $\mu\text{M}$ ) at 10 mL/kg and the others were injected with equal

volume of saline. The mice of each group were imaged with PerkinElmer IVIS spectrum (Waltham, MA, USA).

#### 1.6. Hemolysis assay

The whole blood was obtained from mice in an anticoagulation tube, and the supernatant was removed after centrifugation at 1500 rpm for 5 min. The red blood cells were resuspended in saline to a 2 % RBCs suspension. Different concentrations of PDNP were added to the above suspension and incubated at 37 °C for 1 h. Blood red cells incubated with water and saline were used as positive and negative controls, respectively. After incubation, the samples were centrifuged at 1500 rpm for 5 min, and the absorbance of the supernatant at 540 nm was measured to calculate the hemolysis ratio according to the following formula:

$$\text{Hemolysis rate\%} = \frac{A_s - A_n}{A_p - A_n} \times 100;$$

where  $A_s$ ,  $A_n$ ,  $A_p$  represent the absorbance of the sample group, negative group, and positive group, respectively.

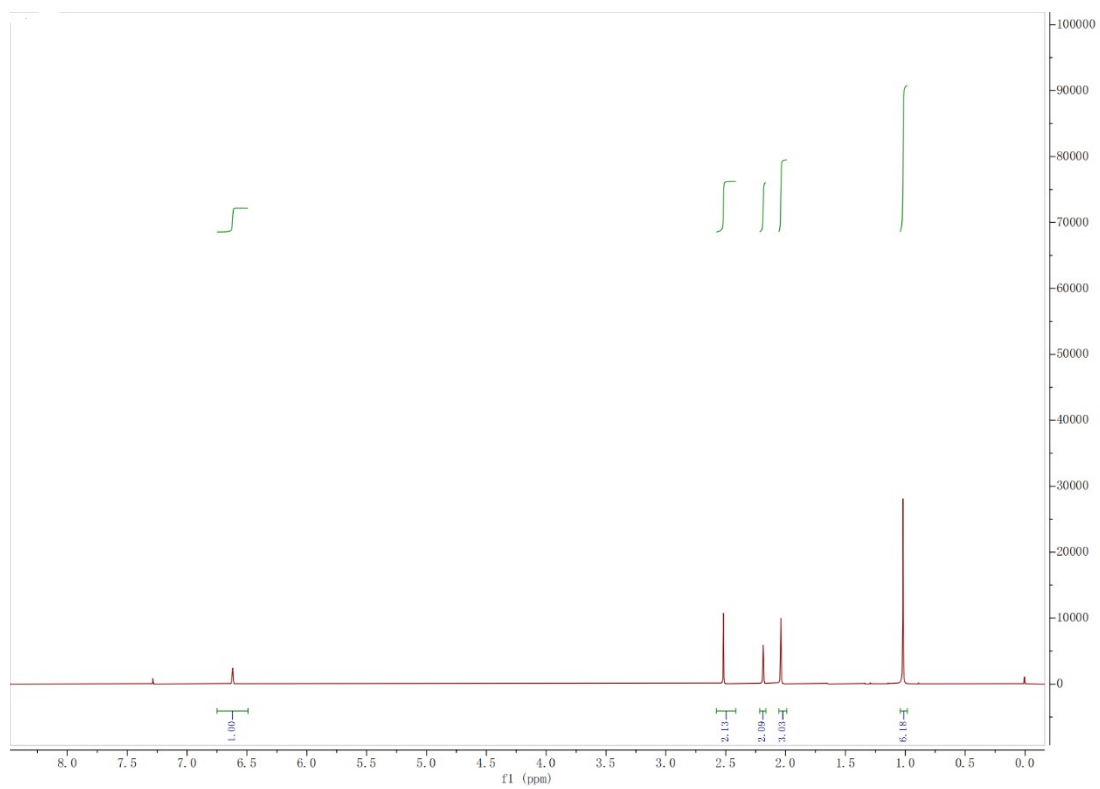

**Fig. S1.**  $^1\text{H}$  NMR spectrum of 2-(3,5,5-trimethylcyclohex-2-en-1-ylidene)  
malononitrile

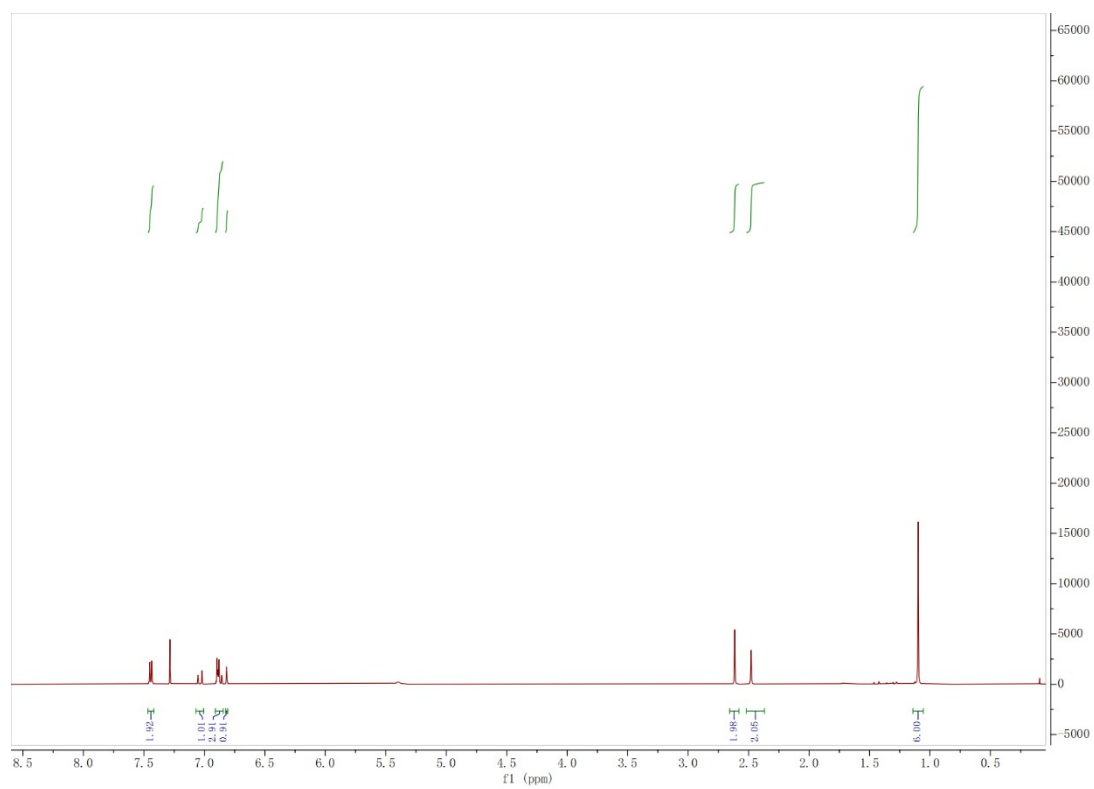

**Fig. S2.**  $^1\text{H}$  NMR spectrum of Compound 1

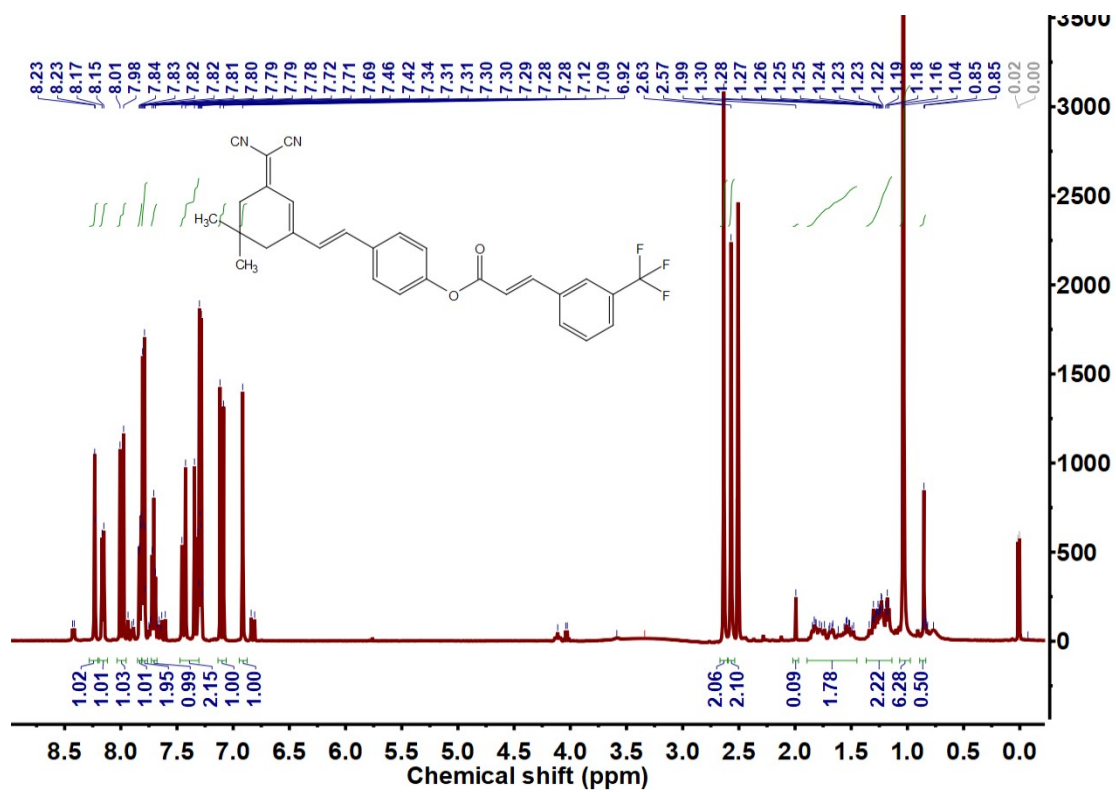

Fig. S3. <sup>1</sup>H NMR spectrum of PDNP



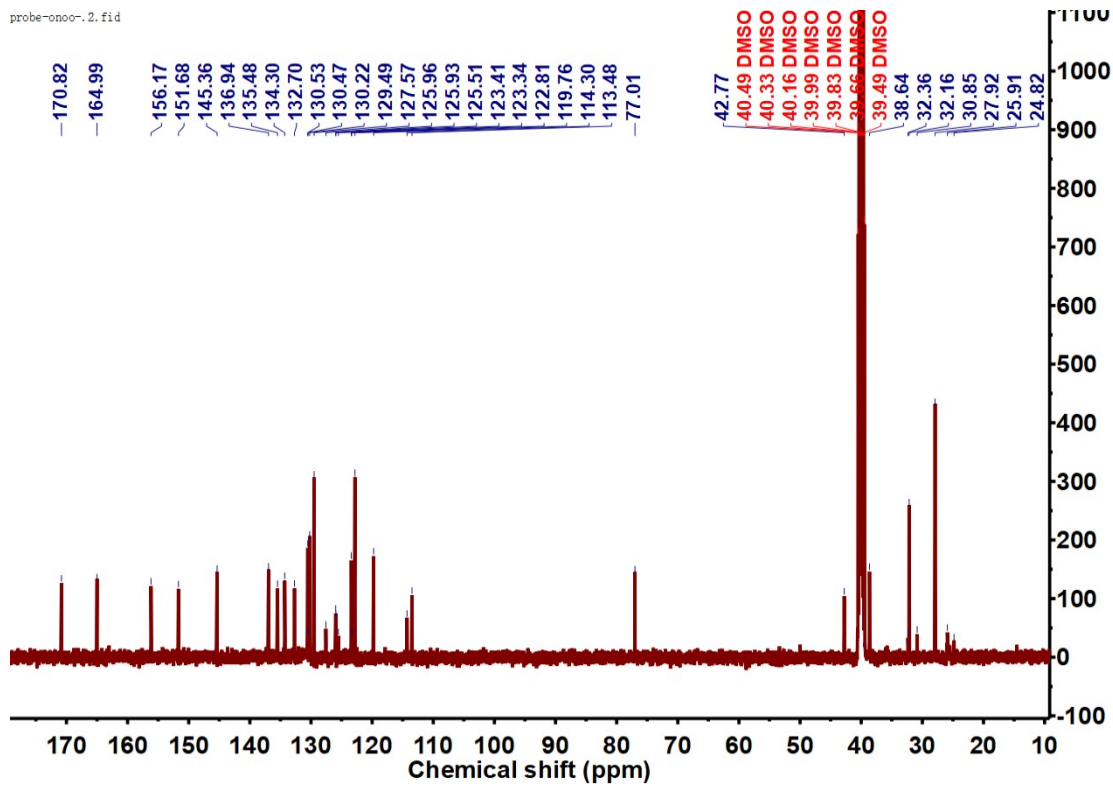

Fig. S4.  $^{13}\text{C}$  NMR spectrum of PDNP

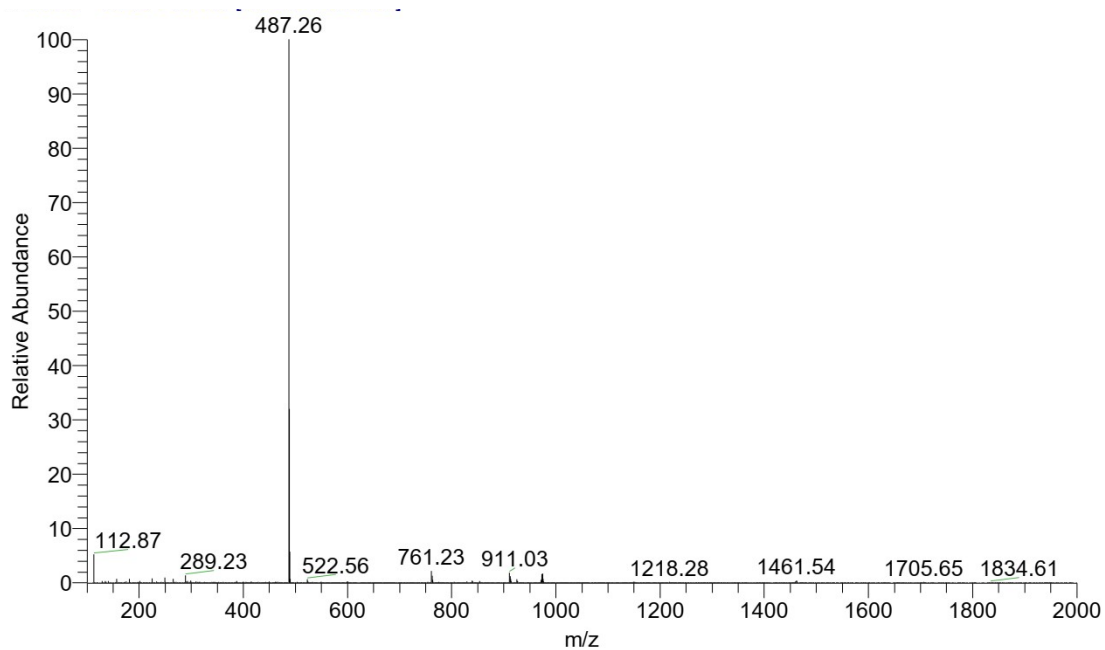

**Fig. S5.** The mass spectra of PDNP.

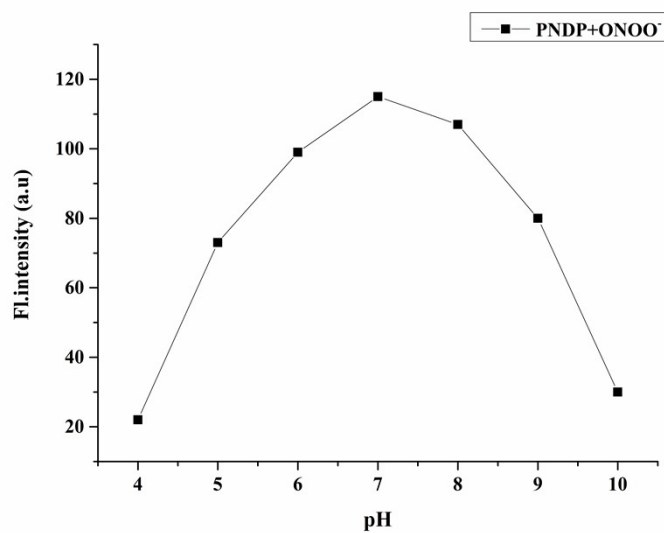

**Fig. S6.** Fluorescence intensity of ONOO<sup>-</sup> PNDP (20 μM) toward (100 μM) at 665 nm in different PBS buffer for 20 min.  $\lambda_{ex}$  = 490 nm, slit widths = 5 nm/5nm

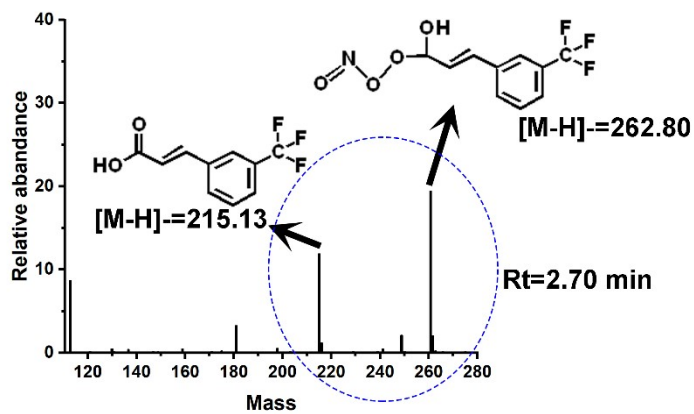

**Fig. S7.** The mass spectra of 3-TCA and the intermediate product formed by ONOO<sup>-</sup> and 3-TCA

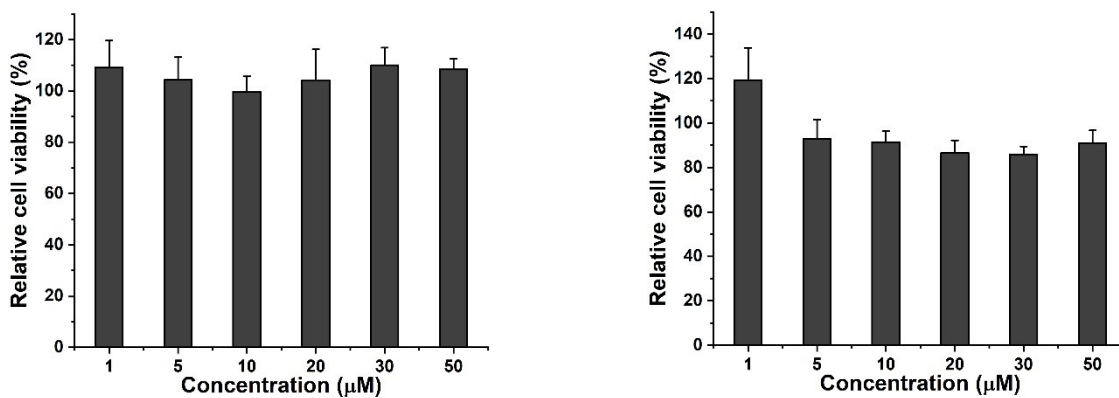

**Fig. S8a.b** Cytotoxicity of PDNP towards HepG2 cells(a) and HK-2 cells (b).

**Fig. S9.** Images of blood red cells after incubation with saline, water and various concentrations of PDNP for 1 h.

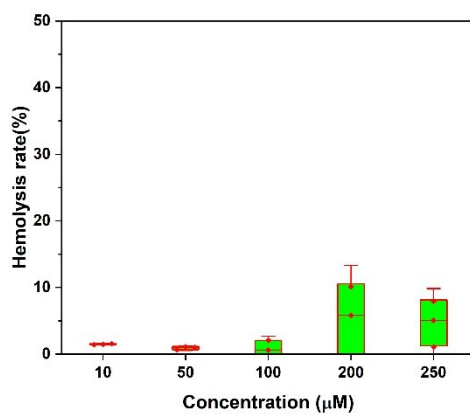

**Fig. S10.** Hemolysis rate of blood red cells after incubation with various concentrations of PDNP for 1 h.

**Table S1.** Comparison of fluorescent probes for  $\text{ONOO}^-$  in recent 5 years

| Probes | $\lambda_{\text{ex}}/\lambda_{\text{em}}$ (nm) | Stokes shift (nm) | LOD (nM) | Application | References |
|--------|------------------------------------------------|-------------------|----------|-------------|------------|
|        |                                                |                   |          |             |            |

|                                                                                     |         |     |       |                                                   |     |
|-------------------------------------------------------------------------------------|---------|-----|-------|---------------------------------------------------|-----|
| 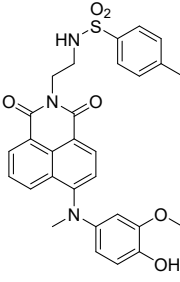   | 450/540 | 90  | 8.3   | In vitro & in vivo<br>Parkinson models            | [1] |
|    | 650/815 | 165 | 27.71 | In vitro & in vivo acute peritonitis model        | [2] |
|   | 454/585 | 131 | 120   | In vitro<br>ONOO <sup>-</sup> detection           | [3] |
|  | 440/525 | 85  | 30    | In vitro & in vivo<br>ONOO <sup>-</sup> detection | [4] |
|  | 450/520 | 70  | 210   | In vitro<br>ONOO <sup>-</sup> detection           | [5] |

|                                                                                     |                         |     |             |                                            |      |
|-------------------------------------------------------------------------------------|-------------------------|-----|-------------|--------------------------------------------|------|
| 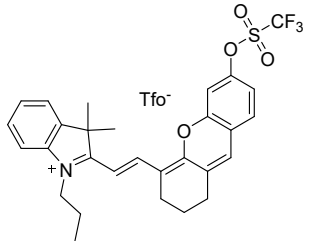   | 360/461                 | 101 | 38.2        | In vitro & in vivo DILI                    | [6]  |
|    | 465/645                 | 180 | 3.5         | In vitro & in vivo DILI                    | [7]  |
|    | 347/484<br>&433/583     | 137 | 120 &<br>77 | In vitro<br>ONOO <sup>-</sup><br>detection | [8]  |
|   | 450/555                 | 105 | 130         | In vitro & in vivo acute liver injury      | [9]  |
|  | 500/654                 | 154 | 54.7        | In vitro & in vivo acute liver injury      | [10] |
|  | 560/620<br>&<br>720/760 | 60  | 210         | In vitro<br>ONOO <sup>-</sup><br>detection | [11] |

|                                                                                   |         |     |       |                                       |           |
|-----------------------------------------------------------------------------------|---------|-----|-------|---------------------------------------|-----------|
| 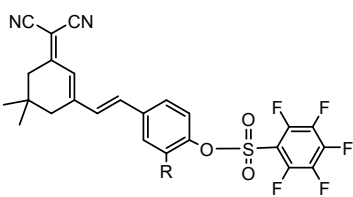 | 570/680 | 110 | 2.3   | In vitro & in vivo lung injury models | [12]      |
|  | 490/665 | 175 | 118.9 | In vitro & in vivo DILI & DIKI models | This work |

## References

- [1] M. Yan, H. Fang, X. Wang, J. Xu, C. Zhang, L. Xu, L. Li, A two-photon fluorescent probe for visualizing endoplasmic reticulum peroxynitrite in Parkinson's disease models, *Sensors and Actuators B: Chemical* 328 (2021), 129003.
- [2] J. Lu, Z. Li, Q. Gao, J. Tan, Z. Sun, L. Chen, J. You, Nonoxidative Strategy for Monitoring Peroxynitrite Fluctuations in Immune Responses of Tumorigenesis, *Analytical Chemistry* 93(7) (2021) 3426-3435.
- [3] J. Cui, S. Zang, H. Nie, T. Shen, S. Su, J. Jing, X. Zhang, An ICT-based fluorescent probe for ratiometric monitoring the fluctuations of peroxynitrite in mitochondria, *Sensors and Actuators B: Chemical* 328 (2021), 129069.
- [4] G. Jiang, C. Li, Q. Lai, X. Liu, Q. Chen, P. Zhang, J. Wang, B.Z. Tang, An easily available ratiometric AIE probe for peroxynitrite in vitro and in vivo imaging, *Sensors and Actuators B: Chemical* 329 (2021), 129223.
- [5] Y. Fang, R.X. Chen, H.-F. Qin, J.J. Wang, Q. Zhang, S. Chen, Y.H. Wen, K.P. Wang, Z.Q. Hu, A chromene based fluorescence probe: Accurate detection of peroxynitrite in mitochondria, not elsewhere, *Sensors and Actuators B: Chemical* 334 (2021), 129603.
- [6] L. Wu, J. Liu, X. Tian, R.R. Groleau, S.D. Bull, P. Li, B. Tang, T.D. James, Fluorescent probe for the imaging of superoxide and peroxynitrite during drug-induced liver injury, *Chemical Science* 12(11) (2021) 3921-3928.
- [7] N. Wang, H. Wang, J. Zhang, X. Ji, H. Su, J. Liu, J. Wang, W. Zhao, Diketopyrrolopyrrole-based sensor for over-expressed peroxynitrite in drug-induced hepatotoxicity via ratiometric fluorescence imaging, *Sensors and Actuators B: Chemical* 352 (2022), 130992.
- [8] J. Gu, Y. Liu, J. Shen, Y. Cao, L. Zhang, Y.D. Lu, B.Z. Wang, H.L. Zhu, A three-

channel fluorescent probe for selective detection of ONOO<sup>-</sup> and its application to cell imaging, *Talanta* 244 (2022), 123401.

[9] K. Wang, R. Guo, X.Y. Chen, Y.S. Yang, L.Q. Qiao, M.L. Wang, Multifunctional lysosome-targetable fluorescent probe for imaging peroxynitrite in acute liver injury model, *Chemical Engineering Journal* 455 (2023), 140491.

[10] W. Yang, R. Liu, X. Yin, Y. Jin, L. Wang, M. Dong, K. Wu, Z. Yan, G. Fan, Z. Tang, Y. Li, H. Jiang, Peroxynitrite activated near-infrared fluorescent probe for evaluating ferroptosis-mediated acute kidney injury, *Sensors and Actuators B: Chemical* 393 (2023),

[11] Q. Liu, C. Dong, J. Zhang, B. Zhao, Y. Zhou, C. Fan, Z. Lu, A mitochondria-targeted ratiometric NIR fluorescent probe for simultaneously monitoring viscosity and ONOO<sup>-</sup> based on two different channels in living HepG2 cells, *Dyes and Pigments* 210 (2023), 111045.

[12] K. Yang, Y. Liu, M. Deng, P. Wang, D. Cheng, S. Li, L. He, Imaging peroxynitrite in endoplasmic reticulum stress and acute lung injury with a near-infrared fluorescent probe, *Analytica Chimica Acta* 1286 (2024),
